# Supplementary material for: Systematic safety evaluation of quasi-solid-state lithium batteries: a case study
Source: Royal Society of Chemistry journal article supplement (doi:10.1039/d3ee03073c), 2023-01-01
Supplement: d3ee03073c1.pdf [file d3ee03073c1.pdf]

## Supplementary Information

### Systematic safety evaluation of quasi-solid-state lithium batteries: a case study

**Authors:**

Wei Li<sup>a</sup>, Hang Li<sup>a</sup>, Jiayang Liu<sup>b</sup>, Shini Lin<sup>a</sup>, Qichen Chen<sup>b</sup>, Weijie Ji<sup>a</sup>, Zheng He<sup>b</sup>, Peng Zhang<sup>b,\*</sup>, Jinbao Zhao<sup>a,c,\*</sup>

**Address:**

<sup>a</sup> College of Chemistry and Chemical Engineering, State-Province Joint Engineering Laboratory of Power Source Technology for New Energy Vehicle, State Key Laboratory of Physical Chemistry of Solid Surfaces, Engineering Research Center of Electrochemical Technology, Ministry of Education, Collaborative Innovation Center of Chemistry for Energy Materials, Xiamen University, Xiamen, 361005, PR China

<sup>b</sup> College of Energy & School of Energy Research, Xiamen University, Xiamen 361102 Fujian, China

<sup>c</sup> Innovation Laboratory for Sciences and Technologies of Energy Materials of Fujian Province (IKKEM), Xiamen 361005, China

\* Corresponding author

**E-mail address:**

Peng Zhang: pengzhang@xmu.edu.cn

Jinbao Zhao: jbzha@xmu.edu.cn

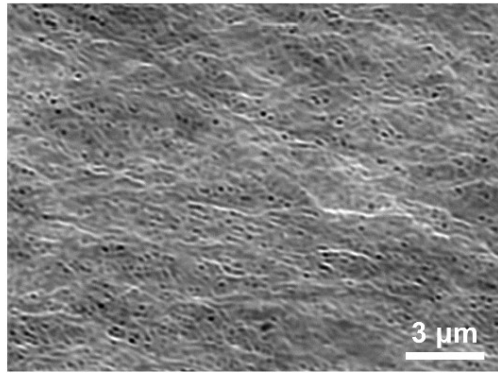

Fig. S1 SEM image of conventional PE separator.

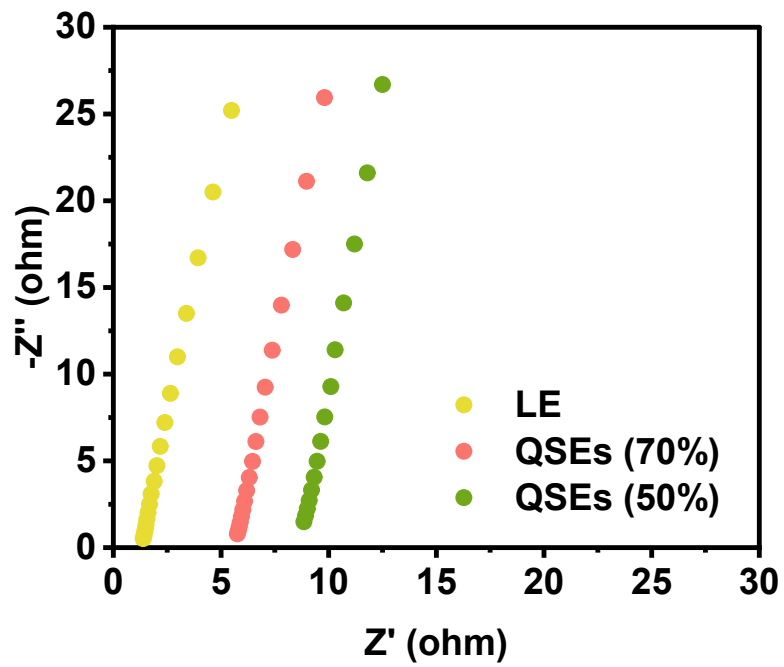

Fig. S2 Nyquist plots of SS || LE || SS and SS || QSEs (70%) || SS and SS || QSEs (50%) || SS.

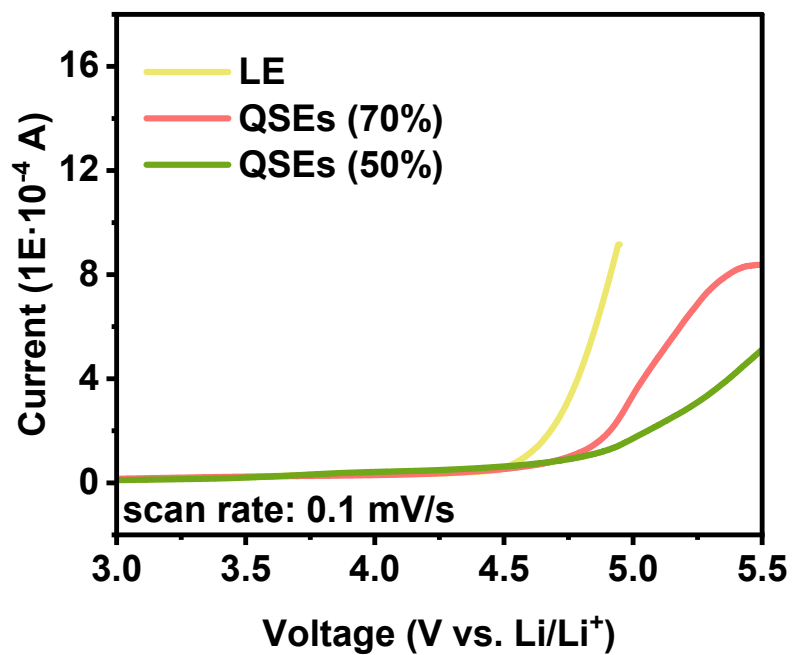

Fig. S3 The LSV plot with Li || LE || SS, Li || QSEs (70%) || SS and Li || QSEs (50%) || SS.

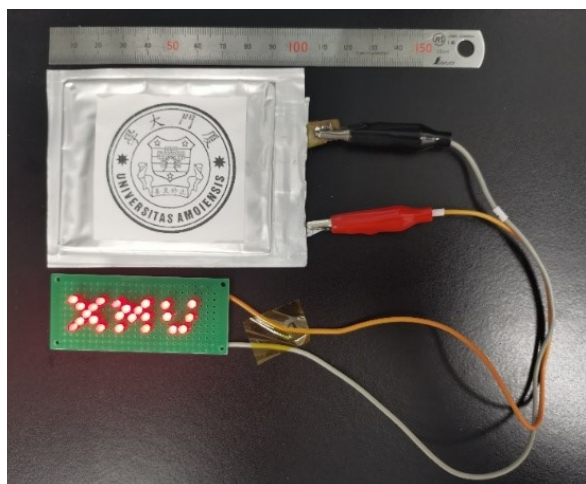

Fig. S4 Optical images of the LED lamp powered by the pouch battery.

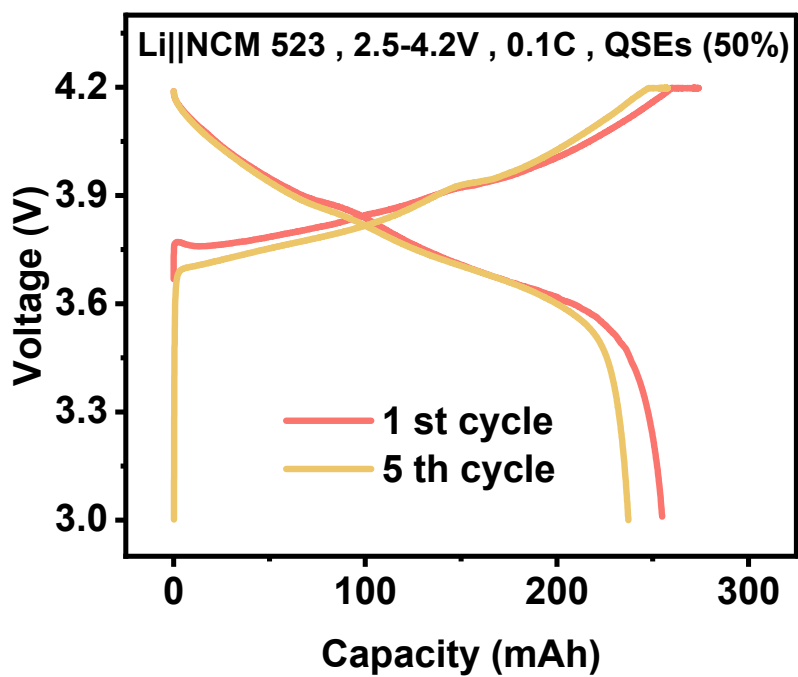

Fig. S5 The cycle performance of Li || QSEs (50%) || NCM523 pouch battery ( $10 \text{ mg cm}^{-2}$ ) at 0.1 C cycle rates in the voltage range 3.0 - 4.2 V.

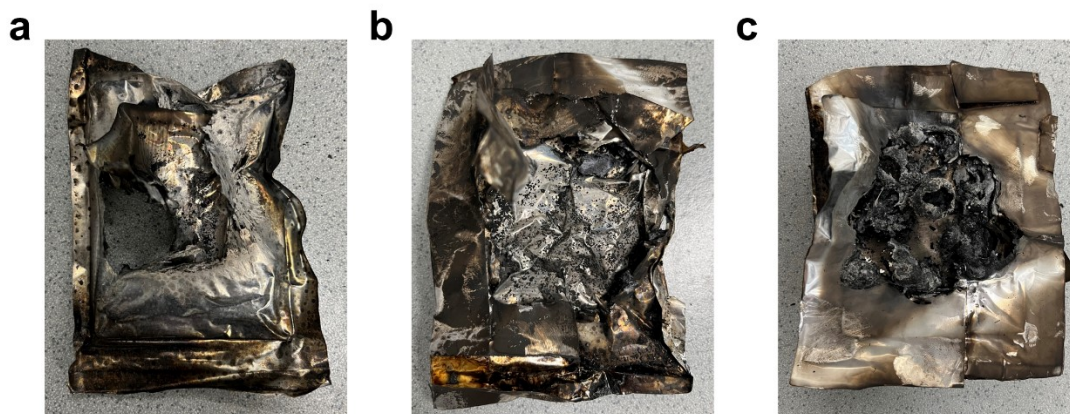

Fig. S6 Optical images of battery after ARC test: (a) LE, (b) QSEs (70%), (c) QSEs (50%).

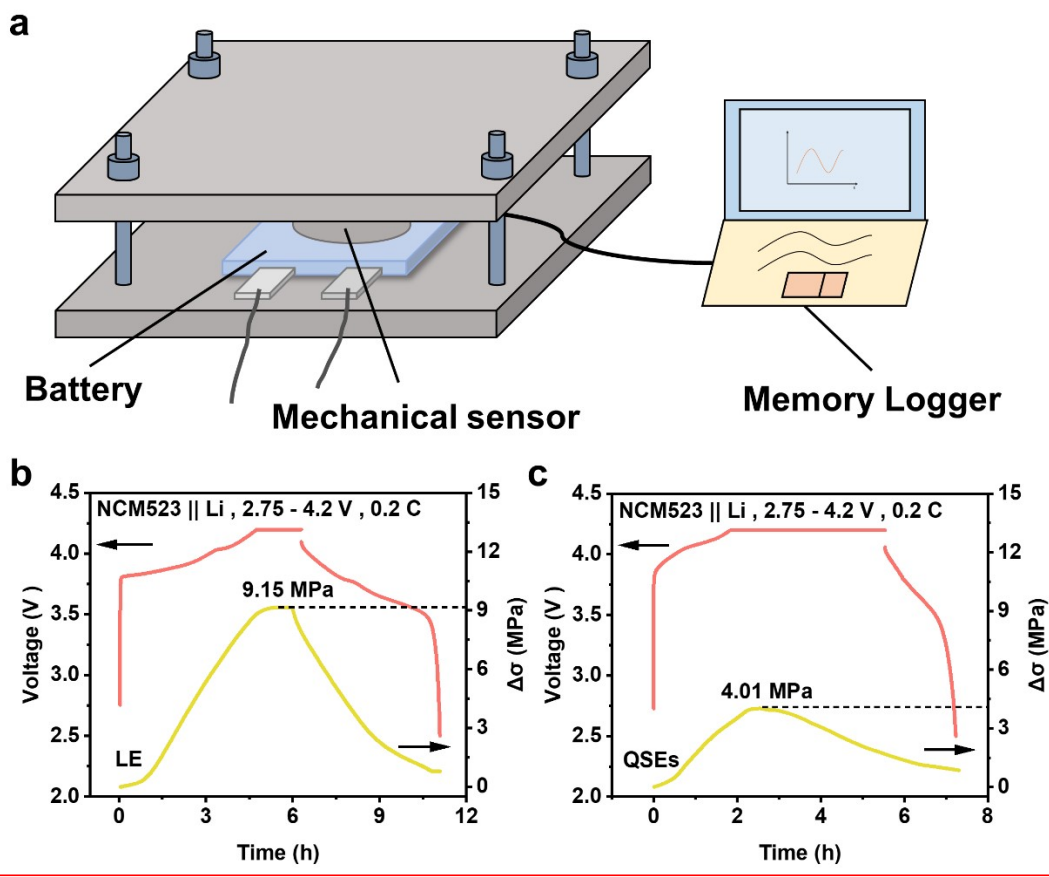

Fig. S7 (a) Diagram of battery stress test; (b) Liquid battery stress test results and voltage curve with time; (c) Quasi-solid-state battery (QSEs (50%)) stress test results and voltage curve with time.

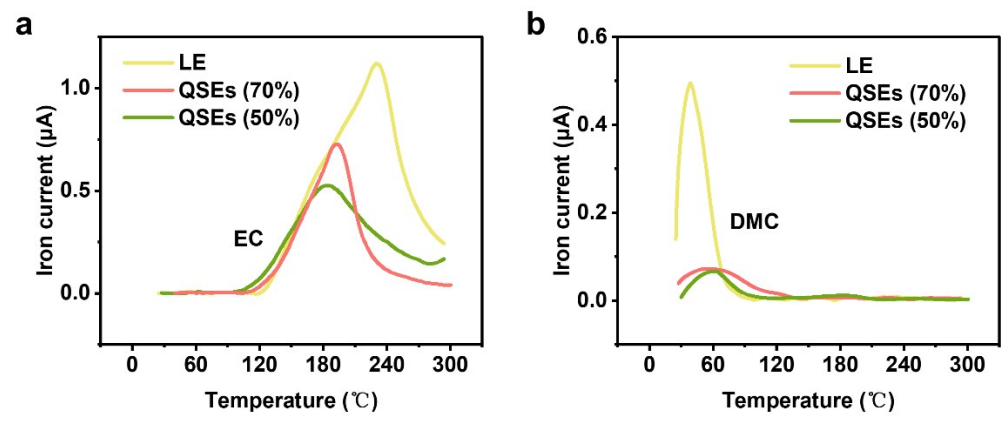

Fig. S8 Mass spectrometry profiles of (a) DMC, (b) EC were collected simultaneously during DSC tests.

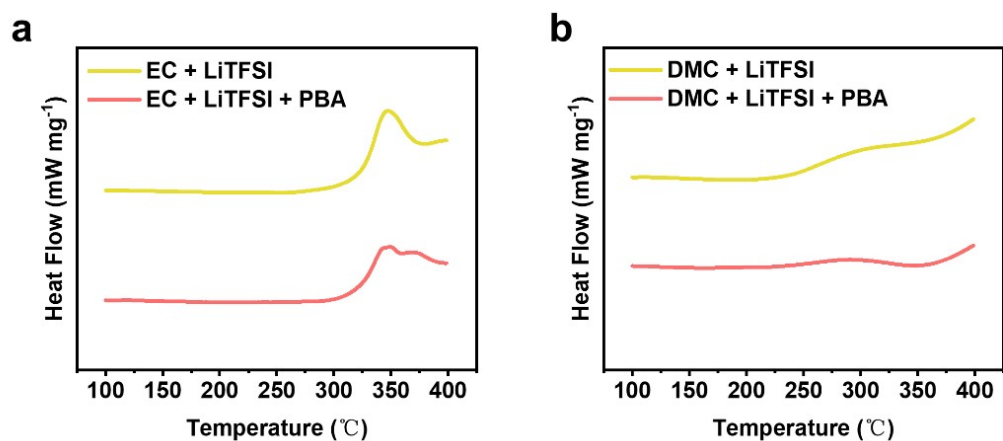

Fig. S9 (a) Heat flow for the EC + LiTFSI system and the EC + LiTFSI + BA polymerization system. (b) Heat flow for the DMC + LiTFSI system and the DMC + LiTFSI + BA polymerization system.

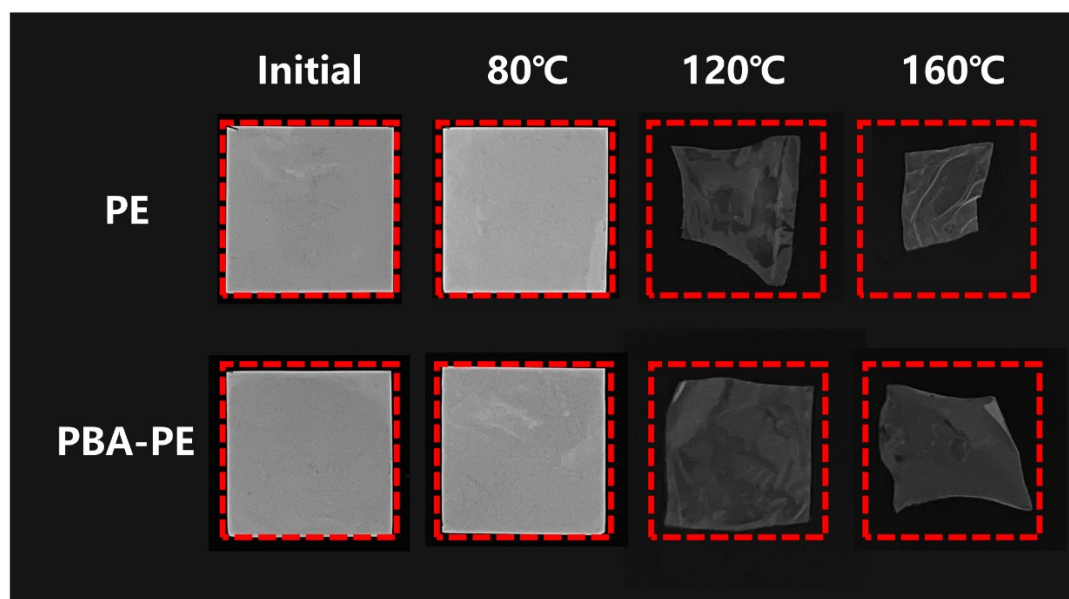

Fig. S10. Photographs of the PE, PBA@PE separators after the thermal shrinkage test at various temperatures for 30 mins.

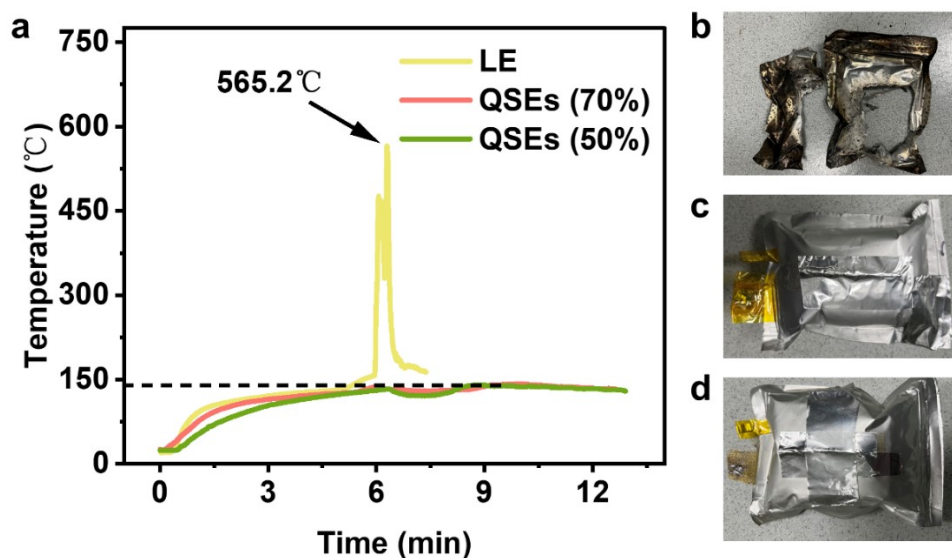

Fig. S11 (a) Real-time temperature change of battery in heat abuse experiment; Optical picture of battery after heat abuse test: (b) LE, (c) QSEs (70%), (d) QSEs (50%).

Table S1. The volume of the plasticizer in the LE and QSEs in all cells.

| Battery name | Plasticizer volume ratio | Polymer volume ratio | Volume ratio of prepolymer in battery | Mass ratio of plasticizer in prepolymer | Mass ratio of plasticizer in battery |
|--------------|--------------------------|----------------------|---------------------------------------|-----------------------------------------|--------------------------------------|
| LE           | 100.0%                   | 0%                   | 30.0%                                 | 100.0%                                  | 30.0%                                |
| QSEs(70%)    | 70.0%                    | 30.0%                | 30.0%                                 | 78.0%                                   | 23.4%                                |
| QSEs(50%)    | 50.0%                    | 50.0%                | 30.0%                                 | 60.3%                                   | 18.1%                                |

Table S2. Information about the pouch battery.

| Electrode     | NCM523                       | Lithium metal |
|---------------|------------------------------|---------------|
| Piece         | 4                            | 5             |
| Length        | 65 [mm]                      | 69 [mm]       |
| Width         | 45 [mm]                      | 49 [mm]       |
| Area Capacity | 1.76 [mAh cm <sup>-2</sup> ] | -             |
